# Supplementary material
Source: Research Square preprint supplement (doi:10.21203/rs.3.rs-9673009/v1)
Supplement: Supplementary file 1 [file 31e19cc422fa207ee07571ba.docx]

**eTable 1. HCUP Diagnostic Codes**

Diagnostic codes used to calculate ROP disease incidence from the National Healthcare Cost and Utilization Projects Kids’ Inpatient Database from 1997 to 2019.

| **Year(s)** | **Classification System** | **Diagnostic Code** |
| --- | --- | --- |
| 1997  2000  2003  2006 | ICD-9-CM | 36221: RETROLENTAL FIBROPLASIA |
| 2009  2012 | ICD-9-CM | 36221: RETROLENTAL FIBROPLASIA  36220: RETINOPH PREMATURITY NOS  36222: RETINOPH PREMATRSTAGE 0  36223: RETINOPH PREMATRSTAGE 1  36224: RETINOPH PREMATRSTAGE 2  36225: RETINOPH PREMATRSTAGE 3  36226: RETINOPH PREMATR.STAGE 4  36227: RETINOPH PREMATRSTAGE 5 |
| 2016  2019 | ICD-10-CM | H35171: Retrolental fibroplasia, right eye  H35172: Retrolental fibroplasia, left eye  H35173: Retrolental fibroplasia, bilateral  H35179: Retrolental fibroplasia, unspecified eye  H35101: Retinopathy of prematurity, unspecified, right eye  H35102: Retinopathy of prematurity, unspecified, left eye  H35103: Retinopathy of prematurity, unspecified, bilateral  H35109: Retinopathy of prematurity, unspecified, unspecified eye  H35111: Retinopathy of prematurity, stage 0, right eye  H35112: Retinopathy of prematurity, stage 0, left eye  H35113: Retinopathy of prematurity, stage 0, bilateral  H35119: Retinopathy of prematurity, stage 0, unspecified eye  H35121: Retinopathy of prematurity, stage 1, right eye  H35122: Retinopathy of prematurity, stage 1, left eye  H35123: Retinopathy of prematurity, stage 1, bilateral  H35129: Retinopathy of prematurity, stage 1, unspecified eye  H35131: Retinopathy of prematurity, stage 2, right eye  H35132: Retinopathy of prematurity, stage 2, left eye  H35133: Retinopathy of prematurity, stage 2, bilateral  H35139: Retinopathy of prematurity, stage 2, unspecified eye  H35141: Retinopathy of prematurity, stage 3, right eye  H35142: Retinopathy of prematurity, stage 3, left eye  H35143: Retinopathy of prematurity, stage 3, bilateral  H35149: Retinopathy of prematurity, stage 3, unspecified eye  H35151: Retinopathy of prematurity, stage 4, right eye  H35152: Retinopathy of prematurity, stage 4, left eye  H35153: Retinopathy of prematurity, stage 4, bilateral  H35159: Retinopathy of prematurity, stage 4, unspecified eye  H35161: Retinopathy of prematurity, stage 5, right eye  H35162: Retinopathy of prematurity, stage 5, left eye  H35163: Retinopathy of prematurity, stage 5, bilateral  H35169: Retinopathy of prematurity, stage 5, unspecified eye |
