# Supplementary material
Source: Research Square preprint supplement (doi:10.21203/rs.3.rs-9673009/v1)
Supplement: Supplementary file 2 [file 4b4edc3d63f17cfd9184d37f.xlsx]

## Sheet: Final Study List
NCT Number	Study Title	Study URL	Interventions	Sponsor	Collaborators	Locations	Associated Publications (specific to study)	Interventions_Agg	Study Type	Funder Type	Funder Name	Study Comp_2017	Study Start	Study Completion	# Participating Sites	Study Location	Country Origin (PI/Sponsor)	Study Countries	Randomization	Enrollment #	Reports Demographics?	Hispanic or Latino	ECD_Lat	EHD_Lat	ECR_Lat	EHR_Lat	White/Caucasian	ECD_White	EHD_White	ECR_White	EHR_White	Black or African American	ECD_AA	EHD_AA	ECR_AA	EHR_AA	American Indian or Alaskan Native	ECD_AI	EHD_AI	ECR_AI	EHR_AI	Asian / Native Hawaiian or Other Pacific Islander	ECD_Asian	EHD_Asian	ECR_Asian	EHR_Asian	More than One Race	ECD_Mix	ECR_Mix
NCT01079715	Safety and Efficacy of Propranolol in Newborns With Retinopathy of Prematurity (PROP-ROP)	https://clinicaltrials.gov/study/NCT01079715	1	Azienda Ospedaliero, Universitaria Meyer	Ospedale Maggiore Policlinico Mangiagalli e Regina Elena	Neonatal Intensive Care Unit - Azienda Ospedaliero-Universitaria Meyer, Florence, I-50139, Italy|Neonatal Intensive Care Unit - Fondazione IRCCS CÃ Granda, Ospedale Maggiore Policlinico, Milan, I-20122, Italy	https://pubmed.ncbi.nlm.nih.gov/24054431/	1	1	3	Meyer Foundation - "A. Meyer" University Children's Hospital	1	2012-01-01	2012-10-01	2	2	#VALUE!	Italy	1	52	1	0	-0.232	-0.156	0	0	0.923	0.386	0.537	1.71881	2.39119	0	-0.141	-0.251	0	0	0	-0.009	-0.006	0	0	0	-0.046	-0.035	0	0	0	-0.037	0
NCT01559571	Registry for Severe ROP and Treatment on Visual Outcomes	https://clinicaltrials.gov/study/NCT01559571	3	Pediatrix		Memorial Hospital of South Bend, South Bend, Indiana, 46601, United States|Summerlin Hospital Medical Center, Las Vegas, Nevada, 89144, United States	https://pubmed.ncbi.nlm.nih.gov/31480086/	3	2	3	Pediatrix	2	2012-05-01	2020-05-01	2	1	#VALUE!	#VALUE!	0	324	1	0.167	-0.09	-0.006	0.893048	0.965318	0.464	-0.031	0.111	0.937374	1.31445	0.248	0.111	-0.026	1.81022	0.905109	0	-0.008	-0.006	0	0	0.0743	0.018	0.037	1.32679	2.00811	0	-0.046	0
NCT02014454	Safety and Efficacy of Propranolol Eye Drops in Treating Retinopathy of Premature	https://clinicaltrials.gov/study/NCT02014454	1	Azienda Ospedaliero, Universitaria Meyer		Neonatal Intensive Care Unit, A. Meyer University Childrens' Hospital, Florence, 50139, Italy|Institute of Pediatrics and Neonatology, Fondazione IRCCS Ospedale Maggiore Policlinico, Mangiagalli e Regina Elena, University of Milan, Milan, 20122, Italy	https://pubmed.ncbi.nlm.nih.gov/27814346/	1	1	3	Meyer Children's Hospital IRCCS	2	2013-11-01	2014-08-01	2	2	#VALUE!	Italy	0	23	1	0	-0.232	-0.156	0	0	0.913	0.376	0.527	1.70019	2.36528	0	-0.141	-0.251	0	0	0	-0.009	-0.006	0	0	0	-0.046	-0.035	0	0	0	-0.037	0
NCT02375971	RAINBOW Study: RAnibizumab Compared With Laser Therapy for the Treatment of INfants BOrn Prematurely With Retinopathy of Prematurity	https://clinicaltrials.gov/study/NCT02375971	1,2	Novartis Pharmaceuticals		Novartis Investigative Site, Loma Linda, California, 92354, United States|Novartis Investigative Site, Sacramento, California, 95817, United States|Novartis Investigative Site, Aurora, Colorado, 80045, United States|Novartis Investigative Site, Chicago, Illinois, 60612, United States|Novartis Investigative Site, Louisville, Kentucky, 40208, United States|Novartis Investigative Site, Baltimore, Ma…		3	1	3	Novartis Pharmaceuticals	2	2015-12-01	2017-12-01	86	3	#VALUE!	United States, Austria, Belgium, Croatia, Czech Republic, Denmark, Egypt, Estonia, France, Germany, Greece, Hungary, India, Italy, Japan, Lithuania, Malaysia, Mexico, Poland, Romania, Russia, Saudi Arabia, Slovakia, Taiwan, Turkey, United Kingdom	1	224	1	0	-0.257	-0.162	0	0	0.591	0.096	0.222	1.19394	1.60163	0.031	-0.106	-0.226	0.226277	0.120623	0	-0.008	-0.007	0	0	0.32	0.264	0.284	5.71429	8.88889	0	-0.046	0
NCT02390531	Phase 1 Trial of Bevacizumab Treatment for Severe Retinopathy of Prematurity (ROP1)	https://clinicaltrials.gov/study/NCT02390531	1	Jaeb Center for Health Research	Pediatric Eye Disease Investigator Group|National Eye Institute (NEI)	The Emory Eye Center, Atlanta, Georgia, 30322, United States|Riley Hospital for Children, Indianapolis, Indiana, 46202, United States|Wilmer Institute, Baltimore, Maryland, 21287, United States|Boston Children's Hospital, Boston, Massachusetts, 02115, United States|Duke University Eye Center, Durham, North Carolina, 27710, United States|Cincinnati Children's Hospital, Cincinnati, Ohio, 45229, Uni…		1	1	3	Jaeb Center for Health Research	2	2015-04-01	2021-05-01	11	1	#VALUE!	#VALUE!	1	120	1	0.142	-0.115	-0.031	0.759358	0.820809	0.542	0.047	0.187	1.09495	1.53541	0.158	0.021	-0.116	1.15328	0.576642	0.017	0.009	0.011	2.125	2.83333	0.05	-0.006	0.013	0.892857	1.35135	0.033	-0.013	0.717391
NCT02484989	UK Surveillance of Treated Retinopathy of Prematurity	https://clinicaltrials.gov/study/NCT02484989	3	Moorfields Eye Hospital NHS Foundation Trust		Moorfields Eye Hospital NHS Foundation Trust, London, EC1V 2PD, United Kingdom	https://pubmed.ncbi.nlm.nih.gov/28325857/	3	2	1	Moorfields Eye Hospital NHS Foundation Trust	2	2013-05-01	2015-07-01	1	2	#VALUE!	United Kingdom	0	270	1	0	-0.232	-0.156	0	0	0.697	0.16	0.311	1.29795	1.8057	0.055	-0.086	-0.196	0.390071	0.219124	0	-0.009	-0.006	0	0	0.138	0.092	0.103	3	3.94286	0.052	0.015	1.40541
NCT02887157	Analyzing Retinal Microanatomy in ROP (BabySTEPS)	https://clinicaltrials.gov/study/NCT02887157	3	Duke University	National Eye Institute (NEI)|University of Pennsylvania|Washington University School of Medicine|University of Florida	University of Florida, Gainesville, Florida, 32611, United States|Washington University, Saint Louis, Missouri, 63130, United States|Duke University Eye Center, Durham, North Carolina, 27705, United States|University of Pennsylvania, Philadelphia, Pennsylvania, 19104, United States	https://pubmed.ncbi.nlm.nih.gov/30506013/	3	2	1	Duke University	2	2014-01-01	2017-05-01	4	1	#VALUE!	United States	0	11	1	0.182	-0.075	0.02	0.973262	1.12346	0.182	-0.313	-0.187	0.367677	0.493225	0.3333	0.196	0.076	2.43285	1.29572	0	-0.008	-0.007	0	0	0.091	0.035	0.055	1.625	2.52778	0.091	-0.045	1.97826
NCT04004208	Aflibercept for Retinopathy of Prematurity - Intravitreal Injection Versus Laser Therapy (FIREFLEYE)	https://clinicaltrials.gov/study/NCT04004208	1,2	Bayer	Regeneron Pharmaceuticals	Many Locations, Multiple Locations, Argentina|Hospital PÃºblico Descentralizado "Dr. Guillermo Rawson", San Juan, 5400, Argentina|Kepler UniversitÃ¤tsklinikum Campus III, Linz, 4021, Austria|Many Locations, Multiple Locations, Austria|AZ St-Jan Brugge Oostende AV, Brugge, 8000, Belgium|Many Locations, Multiple Locations, Belgium|Hospital das ClÃ­nicas de Botucatu - UNESP Botucatu, Botucatu, Sao P…		3	1	3	Bayer	2	2019-09-01	2021-02-01	90	2	#VALUE!	Argentina, Austria, Belgium, Brazil, Bulgaria, Czech Republic, Greece, Hong Kong, Hungary, Israel, Italy, Japan, Korea, Malaysia, Netherlands, Poland, Portugal, Romania, Russia, Singapore, Slovakia, Spain, Sweden, Taiwan, Turkey, Ukraine, United Kingdom	1	113	1	0	-0.257	-0.173	0	0	0.735	0.24	0.382	1.48485	2.08215	0.018	-0.119	-0.256	0.131387	0.0656934	0.009	0.001	0.003	1.125	1.5	0.231	0.175	0.194	4.125	6.24324	0.009	-0.037	0.195652
NCT04101721	Study to Assess the Efficacy, Safety, and Tolerability of Intravitreal Aflibercept Compared to Laser Photocoagulation in Patients With Retinopathy of Prematurity (BUTTERFLEYE)	https://clinicaltrials.gov/study/NCT04101721	1,2	Regeneron Pharmaceuticals		Regeneron Study Site, Phoenix, Arizona, 85016, United States|Regeneron Study Site, La Jolla, California, 92093, United States|Regeneron Study Site, Loma Linda, California, 92354, United States|Regeneron Study Site, Orange, California, 92868, United States|Regeneron Study Site, Palo Alto, California, 94303, United States|Regeneron Study Site, San Diego, California, 92123, United States|Regeneron S…		3	1	3	Regeneron Pharmaceuticals	2	2019-10-01	2022-08-01	52	3	#VALUE!	United States, Bulgaria, Colombia, Czech Republic, Hungary, Korea, Romania, Russia, Slovakia, Taiwan, Thailand, Turkey, Vietnam	1	120	1	0.167	-0.09	-0.006	0.893048	0.965318	0.308	-0.187	-0.045	0.622222	0.872521	0.067	-0.07	-0.207	0.489051	0.244526	0	-0.008	-0.006	0	0	0.475	0.419	0.438	8.48214	12.8378	0	-0.046	0
NCT01238471	Oral Propranolol Versus Placebo for Early Stages of Retinopathy of Prematurity: A Randomized and Prospective Study	https://clinicaltrials.gov/study/NCT01238471	1	Rambam Health Care Campus	Hadassah Medical Organization|Laniado Hospital|Nazareth Hospital	Rambam Health Care Campus, Haifa, 31096, Israel|Hadassah Medical Organization, Jerusalem, Israel|Nazareth Hospital, Nazareth, Israel|Laniado Hospital, Netanya, Israel		1	1	1	Rambam Health Care Campus	1	2010-05-01	2012-07-01	4	2	#VALUE!	Israel	1	20	0	n/a	n/a	n/a	n/a	n/a	n/a	n/a	n/a	n/a	n/a	n/a	n/a	n/a	n/a	n/a	n/a	n/a	n/a	n/a	n/a	n/a	n/a	n/a	n/a	n/a	n/a	n/a	n/a
NCT01955135	Anesthesia for Retinopathy of Prematurity	https://clinicaltrials.gov/study/NCT01955135	1	TC Erciyes University			https://web-s-ebscohost-com.proxy.lib.umich.edu/ehost/pdfviewer/pdfviewer?vid=0&sid=9009b9c2-0d11-4a6d-83c5-4d736a849af8%40redis	1	1	1	TC Erciyes University	1	2010-09-01	2013-03-01	n/a	n/a	#VALUE!	n/a	1	60	0	n/a	n/a	n/a	n/a	n/a	n/a	n/a	n/a	n/a	n/a	n/a	n/a	n/a	n/a	n/a	n/a	n/a	n/a	n/a	n/a	n/a	n/a	n/a	n/a	n/a	n/a	n/a	n/a
NCT01993043	39946-I Laser and Bevacizumab Treatment for Retinopathy of Prematurity	https://clinicaltrials.gov/study/NCT01993043	1,2	Baylor College of Medicine		Baylor College of Medicine, Houston, Texas, 77030, United States|TTUHSC, Lubbock, Texas, 79430, United States	https://www.researchgate.net/publication/271839363_Comparison_of_Ocular_and_Developmental_Outcomes_in_Laser-and_Bevacizumab-treated_Infants_with_Retinopathy_of_Prematurity/link/54d39bd30cf28e0697287b66/download?_tp=eyJjb250ZXh0Ijp7ImZpcnN0UGFnZSI6InB1YmxpY2F0aW9uIiwicGFnZSI6InB1YmxpY2F0aW9uIn19	3	2	1	Baylor College of Medicine	1	2010-09-01	2012-12-01	2	1	#VALUE!	United States	0	42	0	n/a	n/a	n/a	n/a	n/a	n/a	n/a	n/a	n/a	n/a	n/a	n/a	n/a	n/a	n/a	n/a	n/a	n/a	n/a	n/a	n/a	n/a	n/a	n/a	n/a	n/a	n/a	n/a
NCT02134457	Comparing Alternative Ranibizumab Dosages for Safety and Efficacy in Retinopathy of Prematurity (CARE-ROP)	https://clinicaltrials.gov/study/NCT02134457	1	University Hospital Freiburg		University Eye Hospital, Freiburg, Baden-Wuerttemberg, 79106, Germany|University Eye Hospital, Bonn, 53127, Germany|University Eye Hospital, Duesseldorf, 40225, Germany|University Eye Hospital, Kiel, 24105, Germany|University Eye Hospital, Magdeburg, 39120, Germany|University Eye Hospital, Muenster, 48149, Germany|University Eye Hospital, Munich, 80336, Germany|University Eye Hospital, Regensburg…	https://pubmed.ncbi.nlm.nih.gov/29309486	1	1	1	University Hospital Freiburg	1	2014-08-01	2017-01-01	9	2	#VALUE!	Germany	1	19	0	n/a	n/a	n/a	n/a	n/a	n/a	n/a	n/a	n/a	n/a	n/a	n/a	n/a	n/a	n/a	n/a	n/a	n/a	n/a	n/a	n/a	n/a	n/a	n/a	n/a	n/a	n/a	n/a
NCT02164604	Lucentis to Treat Retinopathy of Prematurity (ROP) 3 Plus Disease	https://clinicaltrials.gov/study/NCT02164604	1	Kantonsspital Aarau	Insel Gruppe AG, University Hospital Bern	Department of Ophthalmology, Inselspital, Bern, 3001, Switzerland	https://pubmed.ncbi.nlm.nih.gov/25886603/	1	1	3	Kantonsspital Aarau	1	2011-01-01	2013-10-01	1	2	#VALUE!	Switzerland	0	6	0	n/a	n/a	n/a	n/a	n/a	n/a	n/a	n/a	n/a	n/a	n/a	n/a	n/a	n/a	n/a	n/a	n/a	n/a	n/a	n/a	n/a	n/a	n/a	n/a	n/a	n/a	n/a	n/a
NCT02504944	Safety and Efficacy of Propranolol 0.2% Eye Drops in Treating Retinopathy of Premature: A Pilot Study (DROP-ROP-0.2%)	https://clinicaltrials.gov/study/NCT02504944	1	Azienda Ospedaliero, Universitaria Meyer		Neonatal Intensive Care Unit, Azienda Ospedaliera Spedali Civili di Brescia, Brescia, Italy|Neonatal Intensive Care Unit, A. Meyer University Childrens' Hospital, Florence, 50139, Italy|Institute of Pediatrics and Neonatology, Fondazione IRCCS Ospedale Maggiore Policlinico, Mangiagalli e Regina Elena, University of Milan, Milan, 20122, Italy|Neonatal Intensive Care Unit, Azienda Ospedaliera San G…	multiple	1	1	3	Meyer Children's Hospital IRCCS	2	2015-07-01	2018-08-01	7	2	#VALUE!	Italy	0	98	0	n/a	n/a	n/a	n/a	n/a	n/a	n/a	n/a	n/a	n/a	n/a	n/a	n/a	n/a	n/a	n/a	n/a	n/a	n/a	n/a	n/a	n/a	n/a	n/a	n/a	n/a	n/a	n/a
NCT03115255	Serum Vascular Endothelial Growth Factor in Infants With Intravitreal Ranibizumab	https://clinicaltrials.gov/study/NCT03115255	1	Xinhua Hospital, Shanghai Jiao Tong University School of Medicine		Xinhua Hospital, Shanghai, Shanghai, 200092, China	https://pubmed.ncbi.nlm.nih.gov/31236289/#:~:text=The%20serum%20concentrations%20of%20VEGF%201%20day%20before,%2812.0%2C%2020.8%29%2C%20and%2033.7%20%2824.0%2C%2048.0%29%20pg%2Fml%2C%20respectively.	1	1	1	Xinhua Hospital, Shanghai Jiao Tong University School of Medicine	2	2017-06-01	2018-07-01	1	2	#VALUE!	China	0	15	0	n/a	n/a	n/a	n/a	n/a	n/a	n/a	n/a	n/a	n/a	n/a	n/a	n/a	n/a	n/a	n/a	n/a	n/a	n/a	n/a	n/a	n/a	n/a	n/a	n/a	n/a	n/a	n/a
NCT03334513	Refractive Error and Biometry in Retinopathy of Prematurity	https://clinicaltrials.gov/study/NCT03334513	1	San Ni Chen			https://pubmed.ncbi.nlm.nih.gov/29713524/	1	2	3	Changhua Christian Hospital	1	2011-04-01	2014-04-01	1	2	#VALUE!	Taiwan	0	33	0	n/a	n/a	n/a	n/a	n/a	n/a	n/a	n/a	n/a	n/a	n/a	n/a	n/a	n/a	n/a	n/a	n/a	n/a	n/a	n/a	n/a	n/a	n/a	n/a	n/a	n/a	n/a	n/a
NCT03865134	Evaluation of Visual - Motor Development in Children With Retinopathy of Prematurity	https://clinicaltrials.gov/study/NCT03865134	3	Istanbul Medipol University Hospital		Istanbul Medipol University, Istanbul, Beykoz, Turkey	https://www.researchgate.net/publication/351282985_Assessment_of_Relationship_Between_Retinopathy_of_Prematurity_Severity_and_Visual_Motor_Integration	3	2	1	Istanbul Medipol University Hospital	2	2013-01-01	2017-12-01	1	2	#VALUE!	Turkey	0	104	0	n/a	n/a	n/a	n/a	n/a	n/a	n/a	n/a	n/a	n/a	n/a	n/a	n/a	n/a	n/a	n/a	n/a	n/a	n/a	n/a	n/a	n/a	n/a	n/a	n/a	n/a	n/a	n/a
NCT04537065	Long Term Outcome of Intravitreal Ranibizumab for ROP	https://clinicaltrials.gov/study/NCT04537065	1	Ameera Gamal Abdelhameed		Mansoura University, Mansoura, Dakahlia, Egypt	https://www.researchgate.net/publication/375712908_Refractive_and_Biometric_Outcomes_Following_Intravitreal_Injection_of_Ranibizumab_in_Retinopathy_of_Prematurity_A_Long_-Term_Study	1	2	1	Mansoura University	2	2018-04-01	2022-12-01	1	2	#VALUE!	Egypt	0	53	0	n/a	n/a	n/a	n/a	n/a	n/a	n/a	n/a	n/a	n/a	n/a	n/a	n/a	n/a	n/a	n/a	n/a	n/a	n/a	n/a	n/a	n/a	n/a	n/a	n/a	n/a	n/a	n/a
NCT04539106	Intravitreal Ranibizumab in Recurrent ROP	https://clinicaltrials.gov/study/NCT04539106	1	Ameera Gamal Abdelhameed		Mansoura University, Mansoura, Dakahlia, Egypt	https://pmc.ncbi.nlm.nih.gov/articles/PMC9581953/	1	2	1	Mansoura University	2	2013-03-01	2020-02-01	1	2	#VALUE!	Egypt	0	115	0	n/a	n/a	n/a	n/a	n/a	n/a	n/a	n/a	n/a	n/a	n/a	n/a	n/a	n/a	n/a	n/a	n/a	n/a	n/a	n/a	n/a	n/a	n/a	n/a	n/a	n/a	n/a	n/a
NCT04621136	PhaseI/II Investigator-Initiated Trial to Investigate Safety and Efficacy of Ripasudil in Patients With Retinopathy of Prematurity	https://clinicaltrials.gov/study/NCT04621136	1	Kyushu University		University Hospital of Occupational and Environmental Health, Kitakyushu, Fukuoka, 807-8555, Japan|Yamaguchi University Hospital, Ube, Yamaguchi, 755-850, Japan|Kyushu University Hospital, Fukuoka, 812-8582, Japan	https://pubmed.ncbi.nlm.nih.gov/34315793/	1	1	1	Kyushu University	2	2020-11-01	2022-12-01	3	2	#VALUE!	Japan	0	24	0	n/a	n/a	n/a	n/a	n/a	n/a	n/a	n/a	n/a	n/a	n/a	n/a	n/a	n/a	n/a	n/a	n/a	n/a	n/a	n/a	n/a	n/a	n/a	n/a	n/a	n/a	n/a	n/a
	Identification of candidate genes and pathways in retinopathy of prematurity by whole exome sequencing of preterm infants enriched in phenotypic extremes	https://pubmed.ncbi.nlm.nih.gov/33654115/	3					3	2	2	NIH, NSF, RPB	1	2011-07-01	2016-10-01	9	1	#VALUE!	United States	0	100	1	0	-0.257	-0.162	0	0	1	0.505	0.631	2.0202	2.71003	0	-0.137	-0.257	0	0	0	-0.008	-0.007	0	0	0	-0.056	-0.036	0	0	0	-0.046	0
	COMPARISON OF INTRAVITREAL INJECTION OF RANIBIZUMAB VERSUS LASER THERAPY FOR ZONE II TREATMENT-REQUIRING RETINOPATHY OF PREMATURITY	https://pubmed.ncbi.nlm.nih.gov/27529839/	1,2					3	1	2	Shenzhen Science and Technology Innovation Committee, P.R.China	1	2014-01-01	2014-12-01	19	2	#VALUE!	China	1	50	1	0	-0.232	-0.156	0	0	0	-0.537	-0.386	0	0	0	-0.141	-0.251	0	0	0	-0.009	-0.006	0	0	1	0.954	0.965	21.7391	28.5714	0	-0.037	0
NCT00027222	Final results of the Early Treatment for Retinopathy of Prematurity (ETROP) randomized trial	https://pubmed.ncbi.nlm.nih.gov/15747762/	2					2	1	2	NEI	1	2000-10-01	2002-09-01	26	1	#VALUE!	United States	1	401	1	0.147	-0.025	-0.002	1.176	0.986577	0.638	0.026	0.24	1.04248	1.60302	0.18	0.032	-0.016	1.21622	0.918367	0	-0.01	-0.003	0	0	0	-0.037	-0.024	0	0	0	-0.022	0
CTRI/2018/03/012878	NOPAIN-ROP' trial: intravenous fentanyl and intravenous ketamine for pain relief during laser photocoagulation for retinopathy of prematurity (ROP) in preterm infants: a randomised trial	https://pubmed-ncbi-nlm-nih-gov.proxy.lib.umich.edu/34531205/	1					1	1	n/a	n/a	2	2018-04-01	2019-05-01	1	2	#VALUE!	India	1	97	0	n/a	n/a	n/a	n/a	n/a	n/a	n/a	n/a	n/a	n/a	n/a	n/a	n/a	n/a	n/a	n/a	n/a	n/a	n/a	n/a	n/a	n/a	n/a	n/a	n/a	n/a	n/a	n/a
	Changes in Serum Concentrations of Vascular Endothelial Growth Factors-A and B after Intravitreal Injection of Ranibizumab and Conbercept for Retinopathy of Prematurity	https://pubmed.ncbi.nlm.nih.gov/36709750/	1					1	1	1	Project of Henan Science and Technology Development Plan (182102311209). Haitao Zhang, a retinal professor in Henan eye hospital, sponsored the project.	2	2021-09-01	2022-02-01	1	2	#VALUE!	China	1	20	0	n/a	n/a	n/a	n/a	n/a	n/a	n/a	n/a	n/a	n/a	n/a	n/a	n/a	n/a	n/a	n/a	n/a	n/a	n/a	n/a	n/a	n/a	n/a	n/a	n/a	n/a	n/a	n/a
	Large Spot Laser for Treatment of Retinopathy of Prematurity	https://pubmed-ncbi-nlm-nih-gov.proxy.lib.umich.edu/30566708/	2					2	1	n/a	n/a	n/a	n/a	n/a	1	2	#VALUE!	India	1	40	0	n/a	n/a	n/a	n/a	n/a	n/a	n/a	n/a	n/a	n/a	n/a	n/a	n/a	n/a	n/a	n/a	n/a	n/a	n/a	n/a	n/a	n/a	n/a	n/a	n/a	n/a	n/a	n/a
	Role of fluorescein angiography guided laser treatment in aggressive retinopathy of prematurity	https://pubmed-ncbi-nlm-nih-gov.proxy.lib.umich.edu/36329165/	2					2	1	n/a	n/a	n/a	n/a	n/a	1	2	#VALUE!	India	1	30	0	n/a	n/a	n/a	n/a	n/a	n/a	n/a	n/a	n/a	n/a	n/a	n/a	n/a	n/a	n/a	n/a	n/a	n/a	n/a	n/a	n/a	n/a	n/a	n/a	n/a	n/a	n/a	n/a
	Posterior laser barrage in advancing retinopathy of prematurity: A prospective randomized study	https://pubmed.ncbi.nlm.nih.gov/31124504/	2					2	1	n/a	n/a	1	2012-10-01	2013-10-01	1	2	#VALUE!	India	1	20	0	n/a	n/a	n/a	n/a	n/a	n/a	n/a	n/a	n/a	n/a	n/a	n/a	n/a	n/a	n/a	n/a	n/a	n/a	n/a	n/a	n/a	n/a	n/a	n/a	n/a	n/a	n/a	n/a
	Comparison of clinical outcomes of conbercept versus ranibizumab treatment for retinopathy of prematurity: a multicentral prospective randomised controlled trial	https://pubmed.ncbi.nlm.nih.gov/33637618/	1					1	1	2	Basic Discipline Layout Foundation of the Shenzhen Science and Innovation Commission. P.R. China (Grant No. JCYJ20170817112542555); Shenzhen-hong Kong Cofunded Projects	2	2017-05-01	2019-02-01	5	2	#VALUE!	China	1	60	0	n/a	n/a	n/a	n/a	n/a	n/a	n/a	n/a	n/a	n/a	n/a	n/a	n/a	n/a	n/a	n/a	n/a	n/a	n/a	n/a	n/a	n/a	n/a	n/a	n/a	n/a	n/a	n/a
	Assessment of Lower Doses of Intravitreous Bevacizumab for Retinopathy of Prematurity: A Phase 1 Dosing Study	https://pubmed.ncbi.nlm.nih.gov/28448664/	1					1	1	2	National Eye Institute, National Institutes of Health, Department of Health and Human Services	1	2015-05-01	2016-09-01	11	1	#VALUE!	United States	1	61	0	n/a	n/a	n/a	n/a	n/a	n/a	n/a	n/a	n/a	n/a	n/a	n/a	n/a	n/a	n/a	n/a	n/a	n/a	n/a	n/a	n/a	n/a	n/a	n/a	n/a	n/a	n/a	n/a
	Outcomes of early versus deferred laser after intravitreal ranibizumab in aggressive posterior retinopathy of prematurity	https://pubmed-ncbi-nlm-nih-gov.proxy.lib.umich.edu/34304203/	2					2	1	n/a	n/a	2	2017-09-01	2019-01-01	n/a	n/a	#VALUE!	n/a	1	32	0	n/a	n/a	n/a	n/a	n/a	n/a	n/a	n/a	n/a	n/a	n/a	n/a	n/a	n/a	n/a	n/a	n/a	n/a	n/a	n/a	n/a	n/a	n/a	n/a	n/a	n/a	n/a	n/a
	The Effects of Combuxil and Leizumab on Retinal Function and Serum Interleukin-17A in Premature Infants with Retinopathy	https://pubmed-ncbi-nlm-nih-gov.proxy.lib.umich.edu/36199782/	1					1	1	n/a	n/a	2	2019-02-01	2021-04-01	1	2	#VALUE!	China	1	60	0	n/a	n/a	n/a	n/a	n/a	n/a	n/a	n/a	n/a	n/a	n/a	n/a	n/a	n/a	n/a	n/a	n/a	n/a	n/a	n/a	n/a	n/a	n/a	n/a	n/a	n/a	n/a	n/a
CTRI/2018/05/013779	Role of additional posterior barrage laser in type 1 zone 2 retinopathy of prematurity: A randomized trial	https://pubmed.ncbi.nlm.nih.gov/37870007/	2					2	1	n/a	n/a	2	2016-02-01	2017-05-01	1	2	#VALUE!	India	1	40	0	n/a	n/a	n/a	n/a	n/a	n/a	n/a	n/a	n/a	n/a	n/a	n/a	n/a	n/a	n/a	n/a	n/a	n/a	n/a	n/a	n/a	n/a	n/a	n/a	n/a	n/a	n/a	n/a
	Comparison of Refractive Error Changes in Retinopathy of Prematurity Patients Treated with Diode and Red Lasers	https://pubmed.ncbi.nlm.nih.gov/26915028/	2					2	1	1	Eye Research Center, Farabi Eye Hospital, Tehran University of Medical Sciences	1	2012-02-01	2013-03-01	1	2	#VALUE!	Iran	1	75	0	n/a	n/a	n/a	n/a	n/a	n/a	n/a	n/a	n/a	n/a	n/a	n/a	n/a	n/a	n/a	n/a	n/a	n/a	n/a	n/a	n/a	n/a	n/a	n/a	n/a	n/a	n/a	n/a
	Treatment of retinopathy of prematurity with topical ketorolac tromethamine: a preliminary study	https://pubmed.ncbi.nlm.nih.gov/15298714/	1					1	1	3	PROGRESAR-ICMER	1	1999-01-01	2002-12-01	1	2	#VALUE!	Argentina	0	112	0	n/a	n/a	n/a	n/a	n/a	n/a	n/a	n/a	n/a	n/a	n/a	n/a	n/a	n/a	n/a	n/a	n/a	n/a	n/a	n/a	n/a	n/a	n/a	n/a	n/a	n/a	n/a	n/a
	Outcomes of near confluent laser versus combined less dense laser and bevacizumab treatment of prethreshold ROP Type 1 Zone 2: a randomized controlled trial	https://pubmed.ncbi.nlm.nih.gov/36443750/	1,2					3	1	1	Shiraz University of Medical Science	2	2020-11-01	2021-09-01	1	2	#VALUE!	Iran	1	43	0	n/a	n/a	n/a	n/a	n/a	n/a	n/a	n/a	n/a	n/a	n/a	n/a	n/a	n/a	n/a	n/a	n/a	n/a	n/a	n/a	n/a	n/a	n/a	n/a	n/a	n/a	n/a	n/a
	Efficacy of intravitreal bevacizumab for zone-II retinopathy of prematurity	https://pubmed.ncbi.nlm.nih.gov/27009449/	1					1	1	n/a	n/a	1	2012-09-01	2013-09-01	1	2	#VALUE!	Iran	1	79	0	n/a	n/a	n/a	n/a	n/a	n/a	n/a	n/a	n/a	n/a	n/a	n/a	n/a	n/a	n/a	n/a	n/a	n/a	n/a	n/a	n/a	n/a	n/a	n/a	n/a	n/a	n/a	n/a
	Pharmacokinetics of bevacizumab and its effects on serum VEGF and IGF-1 in infants with retinopathy of prematurity	https://pubmed.ncbi.nlm.nih.gov/25613938/	1,2					3	1	3	Knight Templar Eye Foundation.	1	2012-07-01	2014-01-01	1	1	#VALUE!	United States	1	24	0	n/a	n/a	n/a	n/a	n/a	n/a	n/a	n/a	n/a	n/a	n/a	n/a	n/a	n/a	n/a	n/a	n/a	n/a	n/a	n/a	n/a	n/a	n/a	n/a	n/a	n/a	n/a	n/a
	Intravitreal bevacizumab versus laser treatment in type 1 retinopathy of prematurity: report on fluorescein angiographic findings	https://pubmed.ncbi.nlm.nih.gov/25001158/	1,2					3	1	n/a	n/a	1	2009-09-01	2010-12-01	1	2	#VALUE!	Italy	1	13	0	n/a	n/a	n/a	n/a	n/a	n/a	n/a	n/a	n/a	n/a	n/a	n/a	n/a	n/a	n/a	n/a	n/a	n/a	n/a	n/a	n/a	n/a	n/a	n/a	n/a	n/a	n/a	n/a
	Prospective randomized evaluation of diode-laser and cryotherapy in prethreshold retinopathy of prematurity	https://pubmed.ncbi.nlm.nih.gov/15180835/	2					2	1	n/a	n/a	n/a	n/a	n/a	1	2	#VALUE!	India	1	18	0	n/a	n/a	n/a	n/a	n/a	n/a	n/a	n/a	n/a	n/a	n/a	n/a	n/a	n/a	n/a	n/a	n/a	n/a	n/a	n/a	n/a	n/a	n/a	n/a	n/a	n/a	n/a	n/a
	Oral Dextrose for Pain Management during Laser Treatment of Retinopathy of Prematurity under Topical Anesthesia	https://pubmed.ncbi.nlm.nih.gov/25683077/	1					1	1	n/a	n/a	n/a	n/a	n/a	1	2	#VALUE!	India	1	24	0	n/a	n/a	n/a	n/a	n/a	n/a	n/a	n/a	n/a	n/a	n/a	n/a	n/a	n/a	n/a	n/a	n/a	n/a	n/a	n/a	n/a	n/a	n/a	n/a	n/a	n/a	n/a	n/a
	Pulsed mode versus near-continuous mode delivery of diode laser photocoagulation for high-risk retinopathy of prematurity	https://pubmed.ncbi.nlm.nih.gov/17306999/	2					2	1	3	Research to Prevent Blindness, Inc	n/a	n/a	n/a	n/a	n/a	#VALUE!	n/a	1	9	0	n/a	n/a	n/a	n/a	n/a	n/a	n/a	n/a	n/a	n/a	n/a	n/a	n/a	n/a	n/a	n/a	n/a	n/a	n/a	n/a	n/a	n/a	n/a	n/a	n/a	n/a	n/a	n/a
	Autologous plasmin-assisted vitrectomy for stage 5 retinopathy of prematurity: a preliminary trial	https://pubmed.ncbi.nlm.nih.gov/17601440/	2					2	1	n/a	n/a	n/a	n/a	n/a	n/a	n/a	#VALUE!	n/a	0	4	0	n/a	n/a	n/a	n/a	n/a	n/a	n/a	n/a	n/a	n/a	n/a	n/a	n/a	n/a	n/a	n/a	n/a	n/a	n/a	n/a	n/a	n/a	n/a	n/a	n/a	n/a	n/a	n/a
	Intravitreal pegaptanib combined with diode laser therapy for stage 3+ retinopathy of prematurity in zone I and posterior zone II	https://pubmed.ncbi.nlm.nih.gov/22669848/	1,2					3	1	2	IGA-Ministry of Health, Czech Republic	1	2009-02-01	2011-11-01	1	2	#VALUE!	Czech Republic	1	76	0	n/a	n/a	n/a	n/a	n/a	n/a	n/a	n/a	n/a	n/a	n/a	n/a	n/a	n/a	n/a	n/a	n/a	n/a	n/a	n/a	n/a	n/a	n/a	n/a	n/a	n/a	n/a	n/a
	Laser photocoagulation (810 nm diode) for threshold retinopathy of prematurity: a prospective randomized pilot study of treatment to ridge and avascular retina versus avascular retina alone	https://pubmed.ncbi.nlm.nih.gov/21194006/	2					2	1	n/a	n/a	n/a	n/a	n/a	1	2	#VALUE!	India	1	50	0	n/a	n/a	n/a	n/a	n/a	n/a	n/a	n/a	n/a	n/a	n/a	n/a	n/a	n/a	n/a	n/a	n/a	n/a	n/a	n/a	n/a	n/a	n/a	n/a	n/a	n/a	n/a	n/a
	A comparison of dense versus less dense diode laser photocoagulation patterns for threshold retinopathy of prematurity	https://pubmed.ncbi.nlm.nih.gov/10690834/	2					2	1	n/a	n/a	1	1995-05-01	1997-10-01	1	1	#VALUE!	United States	1	46	0	n/a	n/a	n/a	n/a	n/a	n/a	n/a	n/a	n/a	n/a	n/a	n/a	n/a	n/a	n/a	n/a	n/a	n/a	n/a	n/a	n/a	n/a	n/a	n/a	n/a	n/a	n/a	n/a
	COMPARING THE OUTCOME OF SINGLE VERSUS MULTIPLE SESSION LASER PHOTOABLATION OF FLAT NEOVASCULARIZATION IN ZONE 1 AGGRESSIVE POSTERIOR RETINOPATHY OF PREMATURITY: A Prospective Randomized Study	https://pubmed.ncbi.nlm.nih.gov/25996425/	2					2	1	n/a	n/a	n/a	n/a	n/a	n/a	n/a	#VALUE!	n/a	1	29	0	n/a	n/a	n/a	n/a	n/a	n/a	n/a	n/a	n/a	n/a	n/a	n/a	n/a	n/a	n/a	n/a	n/a	n/a	n/a	n/a	n/a	n/a	n/a	n/a	n/a	n/a	n/a	n/a
	Bevacizumab versus diode laser in stage 3 posterior retinopathy of prematurity	https://pubmed.ncbi.nlm.nih.gov/24428792/	1,2					3	1	n/a	n/a	n/a	n/a	n/a	1	2	Ireland	Ireland	1	14	0	n/a	n/a	n/a	n/a	n/a	n/a	n/a	n/a	n/a	n/a	n/a	n/a	n/a	n/a	n/a	n/a	n/a	n/a	n/a	n/a	n/a	n/a	n/a	n/a	n/a	n/a	n/a	n/a
	Large spot transpupillary thermotherapy: a quicker laser for treatment of high risk prethreshold retinopathy of prematurity - a randomized study	https://pubmed.ncbi.nlm.nih.gov/21350289/	2					2	1	n/a	n/a	n/a	n/a	n/a	n/a	n/a	#VALUE!	n/a	1	5	0	n/a	n/a	n/a	n/a	n/a	n/a	n/a	n/a	n/a	n/a	n/a	n/a	n/a	n/a	n/a	n/a	n/a	n/a	n/a	n/a	n/a	n/a	n/a	n/a	n/a	n/a	n/a	n/a
NCT00622726	Bevacizumab Eliminates the Angiogenic Threat for Retinopathy of Prematurity (BEAT-ROP)	https://www.nejm.org/doi/full/10.1056/NEJMoa1007374	1,2					3	1	3	Research to Prevent Blindness	1	2008-03-01	2010-08-01	15	1	#VALUE!	United States	1	150	1	0.567	0.335	0.404	2.44397	3.47853	0.187	-0.35	-0.186	0.348231	0.50134	0.207	0.066	-0.028	1.46809	0.880851	0	-0.009	-0.005	0	0	0	-0.046	-0.032	0	0	0	-0.037	0
[truncated: 5 more columns]

## Sheet: Coding
Intervention	Intervention_Agg	Study Type	Funder Type	Study Comp_2017	Study Location	Randomization	Reports Demographics?
1 = Drug	1 = Drug	1 = Interventional	1 = Academic	1 = Study completed prior to 4/2017	1 = Domestic (US) only	1 = Randomized	1 = Reported
2 = Procedure	2 = Procedure	2 = Observational	2 = Government	2 = Study completed after 4/2017	2 = International only	2 = Not randomaized	2 = Not reported
3 = Other (diagnostic, surveillance, behavioral, genome sequencing)	3 = Other (diagnostic, surveillance, behavioral, genome sequencing, multiple interventions)		3 = Other (including industry, NGO, private hospital)		3 = Both

## Sheet: Census Data
	2000			2010			2020
Label	Number	Percentage	Peds	Number	Percentage	Peds	Number	Percentage	Peds
Total Number		281421906			308745538			331449281
Not Hispanic or Latino	246116088	87.4545		258267944	83.6507		269369237	81.2701
Hispanic or Latino	35305818	12.5455	17.2	50477594	16.3493	23.2	62080044	18.7299	25.7
White alone	211460626	75.1401	61.2	223553265	72.407	53.7	204227273	61.6164	49.5
Black or African American alone	34658190	12.3154	14.8	38929319	12.6089	14.1	41104200	12.4014	13.7
American Indian and Alaska Native alone	2475956	0.879802	1	2932248	0.94973	0.9	3727135	1.1245	0.8
Asian alone	10242998	3.63973	3.5	14674252	4.75286	4.4	19886049	5.99973	5.4	combine Asian and NHPI
Native Hawaiian and Other Pacific Islander alone	398835	0.141721	0.2	540013	0.174906	0.2	689966	0.208166	0.2
Some other race alone	15359073	5.45767		19107368	6.18871		27915715	8.42232
Population of two or more races:	6826228	2.42562	2.2	9009073	2.91796	3.7	33848943	10.2124	4.6
									https://www.census.gov/content/dam/Census/library/publications/2011/dec/c2010br-02.pdf
									https://www.census.gov/library/visualizations/interactive/how-has-our-nations-population-changed.html
									https://datacenter.aecf.org/data/tables/103-child-population-by-race-and-ethnicity#detailed/1/any/false/2545,1095,2048,574,573,133,11/72,66,67,8367,69,70,71,12/423,424

## Sheet: ROP Incidence Data
Year	ICD-9-CM/ICD-10-CM Diagnoses	Total Number	White alone (%)	Black or African American alone (%)	Hispanic or Latino (%)	Asian or Pacific Islander (%)	Native American (%)	Other (%)	Unknown (%)	Comments
1997	36221: RETROLENTAL FIBROPLASIA	10931	36.7	22	13.1	2.3	0.4	3.2	22.3
2000	36221: RETROLENTAL FIBROPLASIA	12310	39.8	19.6	14.9	2.4	0.3	4.6	18.3
2003	36221: RETROLENTAL FIBROPLASIA	12186	33.6	17.9	15.3	2.2	0.3	5.6	25.1
2006	36221: RETROLENTAL FIBROPLASIA	14801	36	19.6	16	2.6	0.4	6.3	19.1
2009	Total*	16338	37.3	23.5	16.3	3.2	0.5	5.9	13.3
2012	Total*	17534	38.6	25.1	15.6	3.5	0.6	7.6	9
2016	Total**	26978	36.9	25.7	16.2	3.6	0.7	6.5	10.5
2019	Total**	27080	35.3	27.4	17.3	3.7	0.6	7.4	8.5

## Sheet: 1997 by Race
Percent of Total ROP Dx by Race									1 White 2 Black 3 Hispanic 4 Asian or Pacific Islander 5 Native American 6 Other
		Frequency	Percent	Valid Percent	Cumulative Percent				36221: RETROLENTAL FIBROPLASIA
Valid	1	4016	36.7	47.3	47.3
	2	2403	22	28.3	75.6
	3	1435	13.1	16.9	92.5
	4	246	2.3	2.9	95.4
	5	41	0.4	0.5	95.8
	6	354	3.2	4.2	100
	Total	8494	77.7	100
Missing	-9	2436	22.3
Total		10931	100

## Sheet: 2000 by Race
Percent of Total ROP Dx by Race									1 White 2 Black 3 Hispanic 4 Asian or Pacific Islander 5 Native American 6 Other
		Frequency	Percent	Valid Percent	Cumulative Percent				36221: RETROLENTAL FIBROPLASIA
Valid	1	4901	39.8	48.8	48.8
	2	2410	19.6	24	72.7
	3	1837	14.9	18.3	91
	4	301	2.4	3	94
	5	42	0.3	0.4	94.4
	6	562	4.6	5.6	100
	Total	10053	81.7	100
Missing	System	2257	18.3
Total		12310	100

## Sheet: 2003 by Race
Percent of Total ROP Dx by Race									1 White 2 Black 3 Hispanic 4 Asian or Pacific Islander 5 Native American 6 Other
		Frequency	Percent	Valid Percent	Cumulative Percent				36221: RETROLENTAL FIBROPLASIA
Valid	1	4094	33.6	44.9	44.9
	2	2177	17.9	23.8	68.7
	3	1863	15.3	20.4	89.1
	4	274	2.2	3	92.1
	5	36	0.3	0.4	92.5
	6	683	5.6	7.5	100
	Total	9127	74.9	100
Missing	System	3059	25.1
Total		12186	100

## Sheet: 2006 by Race
Percent of Total ROP Dx by Race									(1) white, (2) black, (3) Hispanic, (4) Asian or Pacific Islander, (5) Native American, (6) other
		Frequency	Percent	Valid Percent	Cumulative Percent				36221: RETROLENTAL FIBROPLASIA
Valid	1	5326	36	44.5	44.5
	2	2901	19.6	24.2	68.7
	3	2371	16	19.8	88.5
	4	383	2.6	3.2	91.7
	5	57	0.4	0.5	92.2
	6	933	6.3	7.8	100
	Total	11971	80.9	100
Missing	System	2830	19.1
Total		14801	100

## Sheet: 2009 by Race
Percent of Total ROP Dx by Race								(1) white, (2) black, (3) Hispanic, (4) Asian or Pacific Islander, (5) Native American, (6) other
		Frequency	Percent	Valid Percent	Cumulative Percent			*Disease ICD-9-CM Codes
Valid	1	6097	37.3	43.1	43.1			36221: RETROLENTAL FIBROPLASIA
	2	3841	23.5	27.1	70.2			36220: RETINOPH PREMATURITY NOS (Begin 2008)
	3	2660	16.3	18.8	89			36222: RETINOPH PREMATRSTAGE 0 (Begin 2008)
	4	518	3.2	3.7	92.6			36223: RETINOPH PREMATRSTAGE 1 (Begin 2008)
	5	84	0.5	0.6	93.2			36224: RETINOPH PREMATRSTAGE 2 (Begin 2008)
	6	958	5.9	6.8	100			36225: RETINOPH PREMATRSTAGE 3 (Begin 2008)
	Total	14159	86.7	100				36226: RETINOPH PREMATR.STAGE 4 (Begin 2008)
Missing	System	2179	13.3					36227: RETINOPH PREMATRSTAGE 5 (Begin 2008)
Total		16338	100

## Sheet: 2012 by Race
Percent of Total ROP Dx by Race									(1) white, (2) black, (3) Hispanic, (4) Asian or Pacific Islander, (5) Native American, (6) other
		Frequency	Percent	Valid Percent	Cumulative Percent				*Disease ICD-9-CM Codes
Valid	1	6776	38.6	42.5	42.5				36221: RETROLENTAL FIBROPLASIA
	2	4393	25.1	27.5	70				36220: RETINOPH PREMATURITY NOS (Begin 2008)
	3	2731	15.6	17.1	87.1				36222: RETINOPH PREMATRSTAGE 0 (Begin 2008)
	4	615	3.5	3.9	90.9				36223: RETINOPH PREMATRSTAGE 1 (Begin 2008)
	5	111	0.6	0.7	91.6				36224: RETINOPH PREMATRSTAGE 2 (Begin 2008)
	6	1336	7.6	8.4	100				36225: RETINOPH PREMATRSTAGE 3 (Begin 2008)
	Total	15963	91	100					36226: RETINOPH PREMATR.STAGE 4 (Begin 2008)
Missing	System	1571	9						36227: RETINOPH PREMATRSTAGE 5 (Begin 2008)
Total		17534	100

[truncated: 2 more sheets: 2016 by Race, 2019 by Race]
